# Supplementary material
Source: MDPI journal article supplement (https://www.mdpi.com/2410-3888/8/3/150)

**The complete mitochondrial genome of the fivespot flounder, *Pseudorhombus pentophthalmus* (Pleuronectiformes: Paralichthyidae) from Korea and its phylogenetic analysis**

Yong-Suk Lee <sup>1,2</sup>, Maheshkumar Prakash Patil <sup>1</sup>, Jong-Oh Kim <sup>2,3</sup>, Yu-Jin Lee <sup>4</sup>, Yong Bae Seo <sup>5</sup>, Jin-Koo Kim <sup>4</sup>, Rahul K. Suryawanshi <sup>6</sup> and Gun-Do Kim <sup>2,3\*</sup>

<sup>1</sup> Industry-University Cooperation Foundation, Pukyong National University, 45 Yongso-ro, Nam-Gu, Busan 48513, Republic of Korea

<sup>2</sup> Department of Microbiology, Pukyong National University, 45 Yongso-ro, Nam-Gu, Busan 48513, Republic of Korea

<sup>3</sup> School of Marine and Fisheries Life Science, Pukyong National University, 45 Yongso-ro, Nam-Gu, Busan 48513, Republic of Korea

<sup>4</sup> Department of Marine Biology, Pukyong National University, 45 Yongso-ro, Nam-Gu, Busan 48513, Republic of Korea

<sup>5</sup> Research Institute for Basic Science, Pukyong National University, 45 Yongso-ro, Nam-Gu, Busan 48513, Republic of Korea

<sup>6</sup> Gladstone Institute, San Francisco, CA, USA

\* Correspondence: gundokim@pknu.ac.kr; Tel.: +82-51-629-5618

**Supplementary Materials:**

**Table S1.** General metrics of nucleotide composition of *P. pentophthalmus*.

|                                       | Size<br>(bp) | T%   | C%   | A%   | G%   | A+T% | AT-<br>skew | GC-<br>skew |
|---------------------------------------|--------------|------|------|------|------|------|-------------|-------------|
| <i>Pseudorhombus pentophthalmus</i>   | 16,684       | 26.2 | 29.3 | 26.6 | 18.0 | 52.8 | 0.0076      | -0.2389     |
| <i>Pseudorhombus dupliciocellatus</i> | 16,621       | 25.3 | 31.0 | 26.9 | 16.8 | 52.2 | 0.0307      | -0.2971     |
| <i>Pseudorhombus levisquamis</i>      | 16,604       | 26.1 | 29.9 | 27.0 | 17.1 | 53.1 | 0.0169      | -0.2723     |
| <i>Pseudorhombus cinnamoneus</i>      | 16,599       | 26.3 | 29.5 | 27.0 | 17.2 | 53.3 | 0.0131      | -0.2634     |
| <i>Palichthys olivaceus</i>           | 17,090       | 26.1 | 29.6 | 27.4 | 16.8 | 53.5 | 0.0243      | -0.2759     |
| <i>Palichthys adspersus</i>           | 17,060       | 25.9 | 29.5 | 27.5 | 17.1 | 53.4 | 0.0300      | -0.2661     |
| <i>Palichthys californicus</i>        | 16,858       | 26.0 | 29.5 | 27.5 | 17.0 | 53.5 | 0.0280      | -0.2688     |
| <i>Palichthys dentatus</i>            | 17,033       | 27.0 | 28.0 | 28.2 | 16.7 | 55.2 | 0.0217      | -0.2528     |
| <i>Palichthys lethostigma</i>         | 16,843       | 26.4 | 28.9 | 28.1 | 16.8 | 54.5 | 0.0312      | -0.2703     |

**Table S2.** Codon and relative synonymous codon usage (RSCU) of 12 protein-coding genes (PCGs) in the mitogenome of *P. pentophthalmus*.

| Amino acid | Codon | Count (RSCU) | Amino acid | Codon | Count (RSCU) |
|------------|-------|--------------|------------|-------|--------------|
| Phe        | TTT   | 96.0 (0.87)  | Ala        | GCT   | 55.0 (0.71)  |
|            | TTC   | 125.0 (1.13) |            | GCC   | 148.0 (1.90) |
| Leu        | TTA   | 69.0 (0.68)  |            | GCA   | 89.0 (1.14)  |
|            | TTG   | 32.0 (0.32)  |            | GCG   | 19.0 (0.24)  |
|            | CTT   | 140.0 (1.38) | Tyr        | TAT   | 27.0 (0.52)  |
|            | CTC   | 145.0 (1.43) |            | TAC   | 76.0 (1.48)  |
|            | CTA   | 137.0 (1.35) | His        | CAT   | 25.0 (0.47)  |
|            | CTG   | 84.0 (0.83)  |            | CAC   | 81.0 (1.53)  |
| Ile        | ATT   | 122.0 (1.00) | Gln        | CAA   | 60.0 (1.45)  |
|            | ATC   | 122.0 (1.00) |            | CAG   | 23.0 (0.55)  |
| Met        | ATA   | 85.0 (1.21)  | Asn        | AAT   | 32.0 (0.62)  |
|            | ATG   | 56.0 (0.79)  |            | AAC   | 71.0 (1.38)  |
| Val        | GTT   | 56.0 (1.02)  | Lys        | AAA   | 48.0 (1.39)  |
|            | GTC   | 53.0 (0.97)  |            | AAG   | 21.0 (0.61)  |
|            | GTA   | 67.0 (1.22)  | Asp        | GAT   | 25.0 (0.68)  |
|            | GTG   | 43.0 (0.79)  |            | GAC   | 49.0 (1.32)  |
| Ser        | TCT   | 54.0 (1.30)  | Glu        | GAA   | 51.0 (1.20)  |
|            | TCC   | 69.0 (1.66)  |            | GAG   | 34.0 (0.80)  |
|            | TCA   | 63.0 (1.51)  | Cys        | TGT   | 7.0 (0.47)   |
|            | TCG   | 16.0 (0.38)  |            | TGC   | 23.0 (1.53)  |
|            | AGT   | 9.0 (0.22)   | Trp        | TGA   | 80.0 (1.38)  |
|            | AGC   | 39.0 (0.94)  |            | TGG   | 36.0 (0.62)  |
|            | AGA   | -            | Arg        | CGT   | 7.0 (0.40)   |
|            | AGG   | -            |            | CGC   | 13.0 (0.74)  |
| Pro        | CCT   | 41.0 (0.80)  |            | CGA   | 37.0 (2.11)  |
|            | CCC   | 106.0 (2.06) | Gly        | CGG   | 13.0 (0.74)  |
|            | CCA   | 44.0 (0.85)  |            | GGT   | 29.0 (0.47)  |
|            | CCG   | 15.0 (0.29)  |            | GGC   | 81.0 (1.32)  |
| Thr        | ACT   | 60.0 (0.84)  |            | GGC   | 81.0 (1.32)  |
|            | ACC   | 109.0 (1.52) |            | GGG   | 55.0 (0.89)  |
|            | ACA   | 93.0 (1.30)  | -          | -     | -            |
|            | ACG   | 24.0 (0.34)  | -          | -     | -            |

**Figure S1.** Fivespot flounder (*Pseudorhombus pentophthalmus*) (Photo by Jin-Koo Kim). Creamy-brown body with lateral line and eyes on the left side of the body.

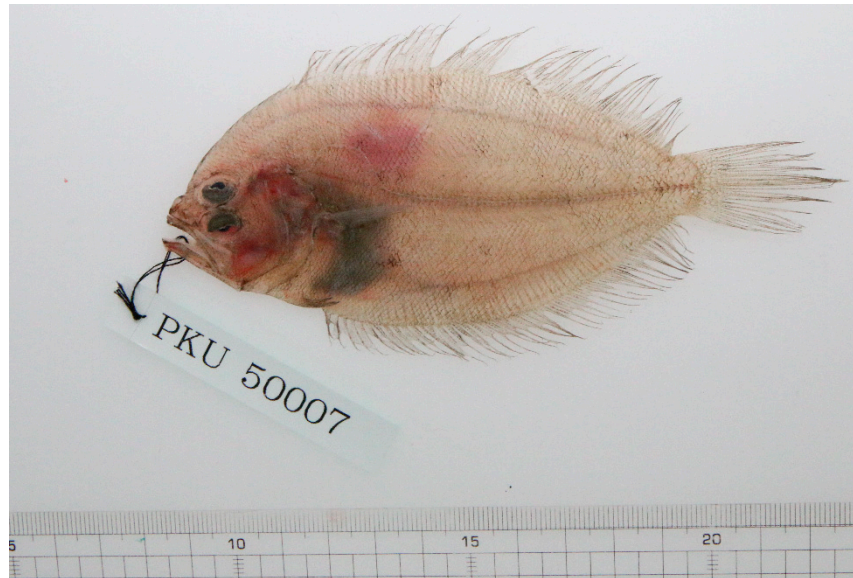

**Figure S2.** Secondary structures of 23 transfer RNAs from *P. pentophthalmus* mitogenome.

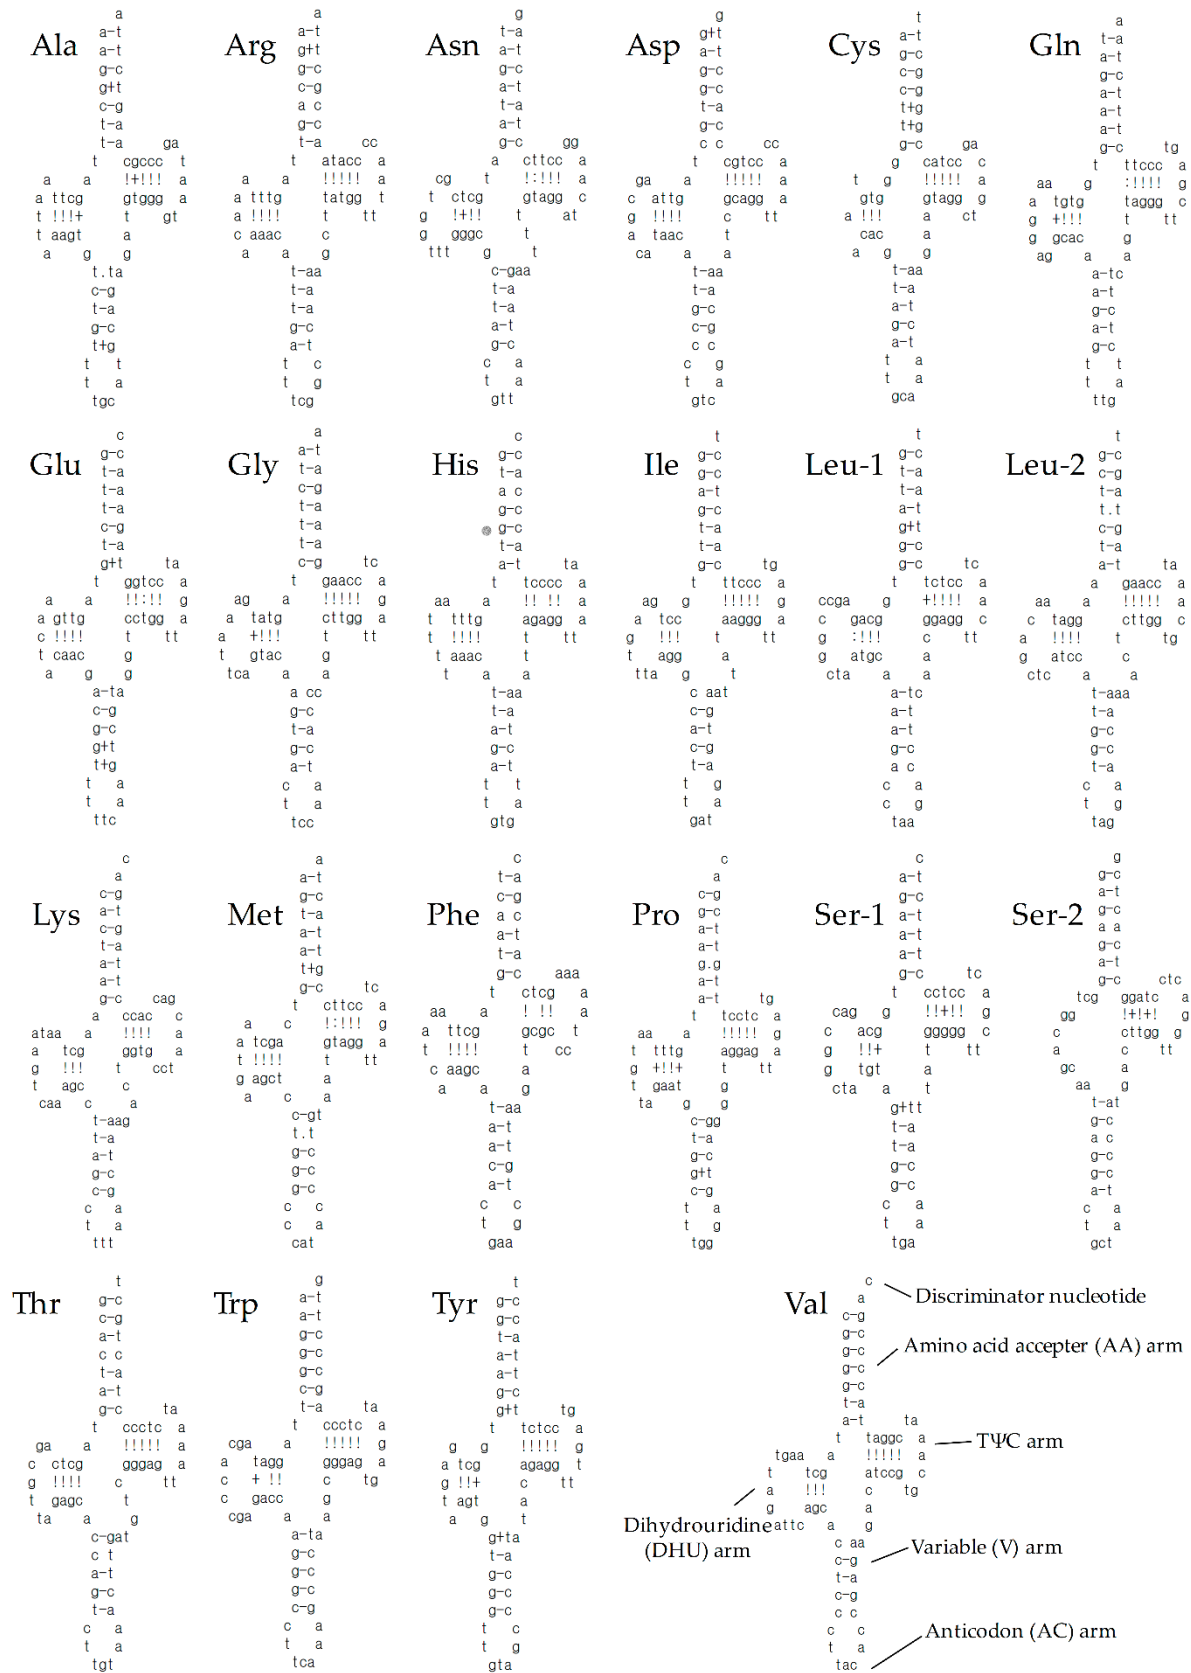

Supplement: s1 [file s1]
